# Supplementary material for: Long noncoding RNA, CCDC26, controls myeloid leukemia cell growth through regulation of KIT expression
Source: Springer Nature journal article supplement (doi:10.1186/s12943-015-0364-7), 2015-04-18

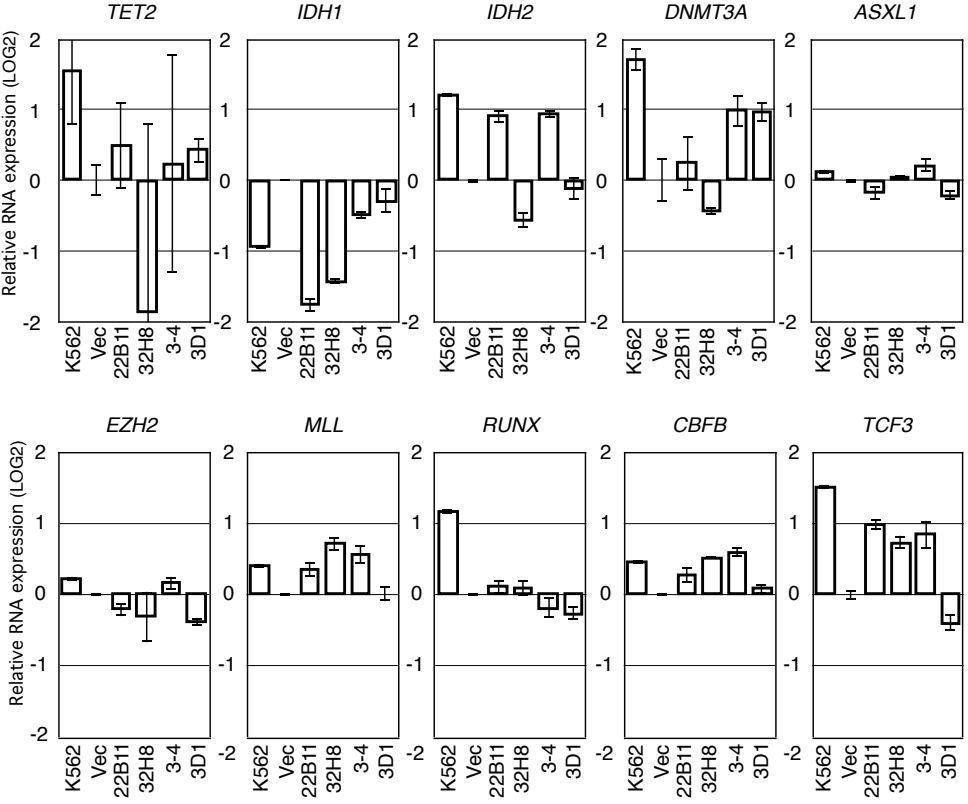

Supplement: MOESM8 [file 9763072]
