# Supplementary material for: Long noncoding RNA, CCDC26, controls myeloid leukemia cell growth through regulation of KIT expression
Source: Springer Nature journal article supplement (doi:10.1186/s12943-015-0364-7), 2015-04-18
Supplement: MOESM9 [file 9763072]

| Primer set    | Forward                     | Reverse                     |
|---------------|-----------------------------|-----------------------------|
| CCDC26-common | AGGCCTGAGGAGAGAAGACAC       | AGAGCAGCCTGAAAAATGGA        |
| CCDC26-short  | ACAGTGCTACTGGCCATAATCAG     | ACAACACATCATAGCCAAATGGAGATT |
| CCDC26-long   | GAGGGGCCAACATCATTAAC        | AGAGCAGCCTGAAAAATGGA        |
| THS1          | GCGATATGAAGTCAGAGATCCTAGTGG | CACAAGGGGTCAACATGATTGTAAAGT |
| THS2          | GTTAGTCTCAGGTCATGCCAGTCACAG | GACTGGACACCAAGGCTAAGCATCT   |
| hAK015428     | AGCACATTTGTGTTTTGGCAAGTT    | GCGATACATGCTTCATGTCTTCAG    |
| HPRT          | CTTTGCTGACCTGCTGGATT        | ACAATCAAGACATTCTTTCCAGTTA   |
| MYC           | GCTGCTTAGACGCTGGATTT        | CACCGAGTCGTAGTCGAGGT        |
| PVT           | TTGGGTCTCCCTATGGAATG        | AGACTGTCCACCGCCAAA          |
| LOC728724     | CAGCATTTTCTCCACCCAC         | ACTCCATCAGCACGGTGATT        |
| GSDMC         | CCAAAATACGAACAAGTTCACATCCTC | GGCCAGGATACTGTAGAACATGACATC |
| KIT           | CACTGTGCATGGCTCTGTTAGAGT    | TAGGAGCAGAACGCAGAGAAAATC    |
| CD24          | CACTGCTCCTACCCACGC          | TGGTGGTGGCATTAGTTGGA        |
| PASD1         | TCAACCAAGTGACGCTACAGT       | TTCTCTTCATCAGGCAGAAGG       |
| MS4A3         | ATTGCACTAGTGGGGACTGC        | TCAGCAGTAGAGACACCATGC       |
| SAMSN1        | GCCACACACGTCTCAAGTCT        | TTACCCAAACCGCCTCCATT        |
| MS4A4         | TGGCTGTCATACATTACATCTG      | GCTCATCAGGGCAGTCAGAA        |
| TET2          | ACACCTGTCAAGACTCAATATGA     | CTGCCACATTAGGACCTGCT        |
| IDH1          | AGACGTCCACCAATCCCATT        | TGAAGCCAGCCTCAATTGTC        |
| IDH2          | TGACCCGTATTATCTGGCAGT       | CCAGTGCAGAGTCAATGGTG        |
| DNMT3A        | GGTTGTGAGAAGGAATGGGC        | CCCTGGTTTTCTTCCACAGC        |
| ASXL1         | GCGCGCCTGGTATTAGAAAA        | TGATTCGGCCAGGCAGTTTA        |
| EZH2          | TCAAGAGGTTTCAGACGAGCT       | CAAGTCACTGGTCACCGAAC        |
| MLL1          | ATCGTCCTCAGCCTCTTCAG        | GGGACTTCGCACTCTGACTT        |
| RUNX          | CCAACCTCCTCTGCTCCGT         | GTTCTTCATGGCTGCGGTAG        |
| CBFB          | GCCGCGAGTGTGAGATTAAG        | GTTTGTGCTGTTCTCCCTG         |
| TCF3          | ACAAGGAGCTCAGTGACCTC        | CTGTGCGACTCAGTGAAGTG        |
| SNORA74       | CAGTTGTCAGCTATCCAGGC        | ATTGTTTGCACCCAGACCAG        |
| BCR/ABL       | ATGCTGACCAACTCGTGTGT        | CCCTGAGGCTCAAAGTCAGA        |
